# Supplementary material for: Construction of a High-Density Paulownia Genetic Map and QTL Mapping of Important Phenotypic Traits Based on Genome Assembly and Whole-Genome Resequencing
Source: MDPI journal article supplement (doi:10.3390/ijms242115647), 2023-10-27
Supplement: s1 [file s1]

**Table S1.** The KEGG pathway enrichment analysis results and candidate gene profiles.

| Traits | NO. | Pathway                                     | Pathway ID | K_id   | candidate genes                          | K_id description                                                                                    |
|--------|-----|---------------------------------------------|------------|--------|------------------------------------------|-----------------------------------------------------------------------------------------------------|
| MTH    | 1   | Valine, leucine and isoleucine biosynthesis | ko00290    | K00826 | evm.TU.Chr10.726(BCAT2)                  | E2.6.1.42, ilvE; branched-chain amino acid aminotransferase [EC:2.6.1.42]                           |
|        |     |                                             |            | K01649 | evm.TU.Chr6.708(IPMSB)                   | leuA, IMS; 2-isopropylmalate synthase [EC:2.3.3.13]                                                 |
|        |     |                                             |            | K01649 | evm.TU.Chr6.709(IPMSA)                   | leuA, IMS; 2-isopropylmalate synthase [EC:2.3.3.13]                                                 |
|        |     |                                             |            | K01649 | evm.TU.Chr6.710(IPMSB)                   | leuA, IMS; 2-isopropylmalate synthase [EC:2.3.3.13]                                                 |
|        |     |                                             |            | K01649 | evm.TU.Chr6.712(IPMSA)                   | leuA, IMS; 2-isopropylmalate synthase [EC:2.3.3.13]                                                 |
|        |     |                                             |            | K01649 | evm.TU.Chr6.713(IPMSB))                  | leuA, IMS; 2-isopropylmalate synthase [EC:2.3.3.13]                                                 |
|        |     |                                             |            | K01687 | evm.TU.Chr6.486(DHAD)                    | ilvD; dihydroxy-acid dehydratase [EC:4.2.1.9]                                                       |
|        |     |                                             |            | K01703 | evm.TU.Chr6.423(IIL1)                    | leuC, IPMI-L; 3-isopropylmalate/(R)-2-methylmalate dehydratase large subunit [EC:4.2.1.33 4.2.1.35] |
|        | 2   | 2-Oxocarboxylic acid metabolism             | ko01210    | K00826 | evm.TU.Chr10.726(BCAT2)                  | E2.6.1.42, ilvE; branched-chain amino acid aminotransferase [EC:2.6.1.42]                           |
|        |     |                                             |            | K00928 | evm.TU.Chr19.861(AK1)                    | lysC; aspartate kinase [EC:2.7.2.4]                                                                 |
|        |     |                                             |            | K01649 | evm.TU.Chr6.708(IPMSB)                   | leuA, IMS; 2-isopropylmalate synthase [EC:2.3.3.13]                                                 |
|        |     |                                             |            | K01649 | evm.TU.Chr6.709(IPMSA)                   | leuA, IMS; 2-isopropylmalate synthase [EC:2.3.3.13]                                                 |
|        |     |                                             |            | K01649 | evm.TU.Chr6.710(IPMSB)                   | leuA, IMS; 2-isopropylmalate synthase [EC:2.3.3.13]                                                 |
|        |     |                                             |            | K01649 | evm.TU.Chr6.712(IPMSA)                   | leuA, IMS; 2-isopropylmalate synthase [EC:2.3.3.13]                                                 |
|        |     |                                             |            | K01649 | evm.TU.Chr6.713(IPMSB))                  | leuA, IMS; 2-isopropylmalate synthase [EC:2.3.3.13]                                                 |
|        |     |                                             |            | K01687 | evm.TU.Chr6.486(DHAD)                    | ilvD; dihydroxy-acid dehydratase [EC:4.2.1.9]                                                       |
|        |     |                                             |            | K01703 | evm.TU.Chr6.423(IIL1)                    | leuC, IPMI-L; 3-isopropylmalate/(R)-2-methylmalate dehydratase large subunit [EC:4.2.1.33 4.2.1.35] |
|        |     |                                             |            | K14682 | evm.TU.Chr10.696_evm.TU.Chr10.697(NAGS1) | argAB; amino-acid N-acetyltransferase [EC:2.3.1.1]                                                  |
|        | 3   | Cutin, suberine and wax biosynthesis        | ko00073    | K13356 | evm.TU.Chr6.803(FAR2)                    | FAR; alcohol-forming fatty acyl-CoA reductase [EC:1.2.1.84]                                         |
|        |     |                                             |            | K13356 | evm.TU.Chr6.804(FAR2)                    | FAR; alcohol-forming fatty acyl-CoA reductase [EC:1.2.1.84]                                         |
|        |     |                                             |            | K13356 | evm.TU.Chr6.805(--)                      | FAR; alcohol-forming fatty acyl-CoA reductase [EC:1.2.1.84]                                         |
|        |     |                                             |            | K13356 | evm.TU.Chr6.806(FAR2)                    | FAR; alcohol-forming fatty acyl-CoA reductase [EC:1.2.1.84]                                         |
|        |     |                                             |            | K13356 | evm.TU.Chr6.807(--)                      | FAR; alcohol-forming fatty acyl-CoA reductase [EC:1.2.1.84]                                         |
|        |     |                                             |            | K13356 | evm.TU.Chr6.808_evm.TU.Chr6.809(FAR2)    | FAR; alcohol-forming fatty acyl-CoA reductase [EC:1.2.1.84]                                         |
|        |     |                                             |            | K17991 | evm.TU.Chr6.404(SOP1)                    | PXG; peroxygenase [EC:1.11.2.3]                                                                     |
|        |     |                                             |            | K20769 | evm.TU.Chr8.1279(CYP94A2)                | CYP94A5; fatty acid omega-hydroxylase [EC:1.14.-.-]                                                 |

|     |   |                                            |         |        |                           |                                                                                                                           |
|-----|---|--------------------------------------------|---------|--------|---------------------------|---------------------------------------------------------------------------------------------------------------------------|
| DBH | 1 | Zeatin biosynthesis                        | ko00908 | K00279 | evm.TU.Chr1.1829(CKX1)    | CKX; cytokinin dehydrogenase [EC:1.5.99.12]                                                                               |
|     |   |                                            |         | K13495 | evm.TU.Chr1.1845(ZOX1)    | CISZOG; cis-zeatin O-glucosyltransferase [EC:2.4.1.215]                                                                   |
|     |   |                                            |         | K13495 | evm.TU.Chr1.1846(ZOX1)    | CISZOG; cis-zeatin O-glucosyltransferase [EC:2.4.1.215]                                                                   |
|     |   |                                            |         | K13495 | evm.TU.Chr1.1847(ZOX1)    | CISZOG; cis-zeatin O-glucosyltransferase [EC:2.4.1.215]                                                                   |
|     |   |                                            |         | K13495 | evm.TU.Chr1.1849(--)      | CISZOG; cis-zeatin O-glucosyltransferase [EC:2.4.1.215]                                                                   |
|     |   |                                            |         | K13495 | evm.TU.Chr1.1850(ZOX1)    | CISZOG; cis-zeatin O-glucosyltransferase [EC:2.4.1.215]                                                                   |
|     |   |                                            |         | K13495 | evm.TU.Chr1.1851(ZOX1)    | CISZOG; cis-zeatin O-glucosyltransferase [EC:2.4.1.215]                                                                   |
|     |   |                                            |         | K13495 | evm.TU.Chr1.1852(ZOX1)    | CISZOG; cis-zeatin O-glucosyltransferase [EC:2.4.1.215]                                                                   |
|     |   |                                            |         | K13495 | evm.TU.Chr1.1853(ZOX1))   | CISZOG; cis-zeatin O-glucosyltransferase [EC:2.4.1.215]                                                                   |
|     | 2 | Linoleic acid metabolism                   | ko00591 | K00454 | evm.TU.Chr19.731(LOX6)    | LOX2S; lipoxygenase [EC:1.13.11.12]                                                                                       |
|     |   |                                            |         | K00454 | evm.TU.Chr8.1067(LOX3.1)  | LOX2S; lipoxygenase [EC:1.13.11.12]                                                                                       |
|     |   |                                            |         | K00454 | evm.TU.Chr8.1108(LOX2.1)  | LOX2S; lipoxygenase [EC:1.13.11.12]                                                                                       |
|     |   |                                            |         | K14674 | evm.TU.Chr1.1805(SDP1)    | TGL4; TAG lipase / steryl ester hydrolase / phospholipase A2 / LPA acyltransferase [EC:3.1.1.3 3.1.1.13 3.1.1.4 2.3.1.51] |
|     | 3 | Synthesis and degradation of ketone bodies | ko00072 | K01640 | evm.TU.Chr1.1744(HMGCL)   | E4.1.3.4, HMGCL, hmgL; hydroxymethylglutaryl-CoA lyase [EC:4.1.3.4]                                                       |
|     |   |                                            |         | K01640 | evm.TU.Chr8.960(HMGCL)    | E4.1.3.4, HMGCL, hmgL; hydroxymethylglutaryl-CoA lyase [EC:4.1.3.4]                                                       |
|     |   |                                            |         | K01641 | evm.TU.Chr14.474(HMGS)    | E2.3.3.10; hydroxymethylglutaryl-CoA synthase [EC:2.3.3.10]                                                               |
| CW  | 1 | Nitrogen metabolism                        | ko00910 | K00261 | evm.TU.Chr12.829(GDHA)    | GLUD1 2, gdhA; glutamate dehydrogenase (NAD(P) <sup>+</sup> ) [EC:1.4.1.3]                                                |
|     |   |                                            |         | K00284 | evm.TU.Chr5.187(FdGOGAT)  | GLU, gltS; glutamate synthase (ferredoxin) [EC:1.4.7.1]                                                                   |
|     |   |                                            |         | K01673 | evm.TU.Chr16.162(BCA1)    | cynT, can; carbonic anhydrase [EC:4.2.1.1]                                                                                |
|     |   |                                            |         | K01673 | evm.TU.Chr19.577(BCA2)    | cynT, can; carbonic anhydrase [EC:4.2.1.1]                                                                                |
|     |   |                                            |         | K01674 | evm.TU.Chr17.720(ACA7)    | cah; carbonic anhydrase [EC:4.2.1.1]                                                                                      |
|     |   |                                            |         | K02575 | evm.TU.Chr16.144(NRT2.7)  | NRT, narK, nrtP, nasA; MFS transporter, NNP family, nitrate/nitrite transporter                                           |
|     |   |                                            |         | K02575 | evm.TU.Chr17.707(NRT2.4)  | NRT, narK, nrtP, nasA; MFS transporter, NNP family, nitrate/nitrite transporter                                           |
|     |   |                                            |         | K02575 | evm.TU.Chr17.708(NRT2.1)  | NRT, narK, nrtP, nasA; MFS transporter, NNP family, nitrate/nitrite transporter                                           |
|     |   |                                            |         | K02575 | evm.TU.Chr17.709(NRT2.1)  | NRT, narK, nrtP, nasA; MFS transporter, NNP family, nitrate/nitrite transporter                                           |
|     | 2 | Ubiquitin mediated proteolysis             | ko04120 | K03178 | evm.TU.Chr17.1043(UBA1)   | UBE1, UBA1; ubiquitin-activating enzyme E1 [EC:6.2.1.45]                                                                  |
|     |   |                                            |         | K03349 | evm.TU.Chr19.374(APC2)    | APC2; anaphase-promoting complex subunit 2                                                                                |
|     |   |                                            |         | K03363 | evm.TU.Chr12.806(CDC20-1) | CDC20; cell division cycle 20, cofactor of APC complex                                                                    |
|     |   |                                            |         | K03363 | evm.TU.Chr12.807(--)      | CDC20; cell division cycle 20, cofactor of APC complex                                                                    |

|  |   |          |         |        |                                          |                                                                             |
|--|---|----------|---------|--------|------------------------------------------|-----------------------------------------------------------------------------|
|  |   |          |         | K03869 | evm.TU.Chr19.417(CUL3A)                  | CUL3; cullin 3                                                              |
|  |   |          |         | K03872 | evm.TU.Chr17.877(elc1)                   | ELOC, TCEB1; elongin-C                                                      |
|  |   |          |         | K04706 | evm.TU.Chr17.1086(Atlg65750)             | PIAS1; E3 SUMO-protein ligase PIAS1 [EC:2.3.2.-]                            |
|  |   |          |         | K06688 | evm.TU.Chr17.757(UBC20)                  | UBE2C, UBC11; ubiquitin-conjugating enzyme E2 C [EC:2.3.2.23]               |
|  |   |          |         | K10140 | evm.TU.Chr17.1013(DDB2)                  | DDB2; DNA damage-binding protein 2                                          |
|  |   |          |         | K10573 | evm.TU.Chr16.217(UBC2)                   | UBE2A, UBC2, RAD6A; ubiquitin-conjugating enzyme E2 A [EC:2.3.2.23]         |
|  |   |          |         | K10576 | evm.TU.Chr16.177(UBC4)                   | UBE2H, UBC8; ubiquitin-conjugating enzyme E2 H [EC:2.3.2.23]                |
|  |   |          |         | K10577 | evm.TU.Chr16.435(SCE1)                   | UBE2I, UBC9; ubiquitin-conjugating enzyme E2 I                              |
|  |   |          |         | K10583 | evm.TU.Chr5.251(UBC22))                  | UBE2S, E2EPF; ubiquitin-conjugating enzyme E2 S [EC:2.3.2.23]               |
|  |   |          |         | K10598 | evm.TU.Chr10.687(CYP65)                  | PPIL2, CYC4, CHP60; peptidyl-prolyl cis-trans isomerase-like 2 [EC:5.2.1.8] |
|  |   |          |         | K10601 | evm.TU.Chr19.341(HRD1A)                  | SYVN1, HRD1; E3 ubiquitin-protein ligase synoviolin [EC:2.3.2.27]           |
|  |   |          |         | K10606 | evm.TU.Chr10.729(Fancl)                  | FANCL, PHF9; E3 ubiquitin-protein ligase FANCL [EC:2.3.2.27]                |
|  | 3 | Ribosome | ko03010 | K02866 | evm.TU.Chr5.337(RPL10))                  | RP-L10e, RPL10; large subunit ribosomal protein L10e                        |
|  |   |          |         | K02870 | evm.TU.Chr17.737(RPL12)                  | RP-L12e, RPL12; large subunit ribosomal protein L12e                        |
|  |   |          |         | K02871 | evm.TU.Chr16.73(rplM)                    | RP-L13, MRPL13, rplM; large subunit ribosomal protein L13                   |
|  |   |          |         | K02877 | evm.TU.Chr12.880_evm.TU.Chr12.881(RPL15) | RP-L15e, RPL15; large subunit ribosomal protein L15e                        |
|  |   |          |         | K02897 | evm.TU.Chr16.400(rplY)                   | RP-L25, rplY; large subunit ribosomal protein L25                           |
|  |   |          |         | K02898 | evm.TU.Chr10.685(RPL26A)                 | RP-L26e, RPL26; large subunit ribosomal protein L26e                        |
|  |   |          |         | K02899 | evm.TU.Chr16.51(RPL27)                   | RP-L27, MRPL27, rpmA; large subunit ribosomal protein L27                   |
|  |   |          |         | K02911 | evm.TU.Chr19.368(--)                     | RP-L32, MRPL32, rpmF; large subunit ribosomal protein L32                   |
|  |   |          |         | K02915 | evm.TU.Chr16.230(RPL34)                  | RP-L34e, RPL34; large subunit ribosomal protein L34e                        |
|  |   |          |         | K02915 | evm.TU.Chr19.407(RPL34)                  | RP-L34e, RPL34; large subunit ribosomal protein L34e                        |
|  |   |          |         | K02915 | evm.TU.Chr19.408(RPL34)                  | RP-L34e, RPL34; large subunit ribosomal protein L34e                        |
|  |   |          |         | K02918 | evm.TU.Chr17.832(RPL35)                  | RP-L35e, RPL35; large subunit ribosomal protein L35e                        |
|  |   |          |         | K02924 | evm.TU.Chr16.303(RPL39C)                 | RP-L39e, RPL39; large subunit ribosomal protein L39e                        |
|  |   |          |         | K02926 | evm.TU.Chr17.924(RPL4)                   | RP-L4, MRPL4, rplD; large subunit ribosomal protein L4                      |
|  |   |          |         | K02935 | evm.TU.Chr10.693(rplL)                   | RP-L7, MRPL12, rplL; large subunit ribosomal protein L7/L12                 |
|  |   |          |         | K02935 | evm.TU.Chr16.156(RPL12)                  | RP-L7, MRPL12, rplL; large subunit ribosomal protein L7/L12                 |
|  |   |          |         | K02936 | evm.TU.Chr16.34(RPL7A-1)                 | RP-L7Ae, RPL7A; large subunit ribosomal protein L7Ae                        |
|  |   |          |         | K02939 | evm.TU.Chr17.680(RPL9)                   | RP-L9, MRPL9, rplI; large subunit ribosomal protein L9                      |
|  |   |          |         | K02950 | evm.TU.Chr11.1018(rps12-B)               | RP-S12, MRPS12, rpsL; small subunit ribosomal protein S12                   |
|  |   |          |         | K02957 | evm.TU.Chr17.825(RPS15A)                 | RP-S15Ae, RPS15A; small subunit ribosomal protein S15Ae                     |

|       |   |                                      |         |        |                                       |                                                                    |
|-------|---|--------------------------------------|---------|--------|---------------------------------------|--------------------------------------------------------------------|
|       |   |                                      |         | K02957 | evm.TU.Chr17.826(RPS15A)              | RP-S15Ae, RPS15A; small subunit ribosomal protein S15Ae            |
|       |   |                                      |         | K02957 | evm.TU.Chr17.829(RPS15AA)             | RP-S15Ae, RPS15A; small subunit ribosomal protein S15Ae            |
|       |   |                                      |         | K02957 | evm.TU.Chr17.841(RPS15AA)             | RP-S15Ae, RPS15A; small subunit ribosomal protein S15Ae            |
|       |   |                                      |         | K02957 | evm.TU.Chr17.844(RPS15A)              | RP-S15Ae, RPS15A; small subunit ribosomal protein S15Ae            |
|       |   |                                      |         | K02966 | evm.TU.Chr16.280(RPS19A)              | RP-S19e, RPS19; small subunit ribosomal protein S19e               |
|       |   |                                      |         | K02976 | evm.TU.Chr17.1099(RPS26C)             | RP-S26e, RPS26; small subunit ribosomal protein S26e               |
|       |   |                                      |         | K02981 | evm.TU.Chr5.274(RPS2D)                | RP-S2e, RPS2; small subunit ribosomal protein S2e                  |
|       |   |                                      |         | K02992 | evm.TU.Chr17.986(RPS7)                | RP-S7, MRPS7, rpsG; small subunit ribosomal protein S7             |
|       |   |                                      |         | K02997 | evm.TU.Chr16.226(RPS9C)               | RP-S9e, RPS9; small subunit ribosomal protein S9e                  |
|       |   |                                      |         | K02997 | evm.TU.Chr19.423(RPS9C)               | RP-S9e, RPS9; small subunit ribosomal protein S9e                  |
| A-LBA | 1 | Zeatin biosynthesis                  | ko00908 | K00279 | evm.TU.Chr5.146(CKX1))                | CKX; cytokinin dehydrogenase [EC:1.5.99.12]                        |
|       |   |                                      |         | K13495 | evm.TU.Chr5.133_evm.TU.Chr5.132(ZOX1) | CISZOG; cis-zeatin O-glucosyltransferase [EC:2.4.1.215]            |
|       |   |                                      |         | K13495 | evm.TU.Chr5.134(ZOX1)                 | CISZOG; cis-zeatin O-glucosyltransferase [EC:2.4.1.215]            |
|       |   |                                      |         | K13495 | evm.TU.Chr5.135(ZOX1)                 | CISZOG; cis-zeatin O-glucosyltransferase [EC:2.4.1.215]            |
|       |   |                                      |         | K13495 | evm.TU.Chr5.144(ZOX1)                 | CISZOG; cis-zeatin O-glucosyltransferase [EC:2.4.1.215]            |
|       |   |                                      |         | K13495 | evm.TU.Chr5.145(ZOG1)                 | CISZOG; cis-zeatin O-glucosyltransferase [EC:2.4.1.215]            |
|       | 2 | Cutin, suberine and wax biosynthesis | ko00073 | K13356 | evm.TU.Chr5.36(FAR2)                  | FAR; alcohol-forming fatty acyl-CoA reductase [EC:1.2.1.84]        |
|       |   |                                      |         | K13356 | evm.TU.Chr5.37(FAR2))                 | FAR; alcohol-forming fatty acyl-CoA reductase [EC:1.2.1.84]        |
|       |   |                                      |         | K15400 | evm.TU.Chr5.33(HHT1)                  | HHT1; omega-hydroxypalmitate O-feruloyl transferase [EC:2.3.1.188] |
|       |   |                                      |         | K15400 | evm.TU.Chr5.34(PHT1)                  | HHT1; omega-hydroxypalmitate O-feruloyl transferase [EC:2.3.1.188] |
|       |   |                                      |         | K15400 | evm.TU.Chr5.35(HHT1)                  | HHT1; omega-hydroxypalmitate O-feruloyl transferase [EC:2.3.1.188] |
|       | 3 | Selenocompound metabolism            | ko00450 | K00384 | evm.TU.Chr5.128(NTRC)                 | trxB, TRR; thioredoxin reductase (NADPH) [EC:1.8.1.9]              |
|       |   |                                      |         | K01739 | evm.TU.Chr16.250(CGS1)                | metB; cystathionine gamma-synthase [EC:2.5.1.48]                   |
|       |   |                                      |         | K01760 | evm.TU.Chr5.180(At3g57050))           | metC; cysteine-S-conjugate beta-lyase [EC:4.4.1.13]                |
| A-DLB | 1 | Tyrosine metabolism                  | ko00350 | K00276 | evm.TU.Chr18.995(maol)                | AOC3, AOC2, tynA; primary-amine oxidase [EC:1.4.3.21]              |
|       |   |                                      |         | K00422 | evm.TU.Chr4.217(co-2)                 | E1.10.3.1; polyphenol oxidase [EC:1.10.3.1]                        |
|       |   |                                      |         | K00422 | evm.TU.Chr4.219(co-2)                 | E1.10.3.1; polyphenol oxidase [EC:1.10.3.1]                        |
|       |   |                                      |         | K00422 | evm.TU.Chr4.221(co-2)                 | E1.10.3.1; polyphenol oxidase [EC:1.10.3.1]                        |
|       |   |                                      |         | K00422 | evm.TU.Chr4.222(co-2)                 | E1.10.3.1; polyphenol oxidase [EC:1.10.3.1]                        |
|       |   |                                      |         | K00422 | evm.TU.Chr4.223(co-2)                 | E1.10.3.1; polyphenol oxidase [EC:1.10.3.1]                        |
|       |   |                                      |         | K01557 | evm.TU.Chr6.108(FAHD1)                | FAHD1; acylpyruvate hydrolase [EC:3.7.1.5]                         |
|       |   |                                      |         | K18857 | evm.TU.Chr6.1448(ADH1)                | ADH1; alcohol dehydrogenase class-P [EC:1.1.1.1]                   |

|  |   |                                    |         |        |                                          |                                                                                                  |
|--|---|------------------------------------|---------|--------|------------------------------------------|--------------------------------------------------------------------------------------------------|
|  |   |                                    |         | K18857 | evm.TU.Chr6.1450_evm.TU.Chr6.1451(ADH1)) | ADH1; alcohol dehydrogenase class-P [EC:1.1.1.1]                                                 |
|  | 2 | Thimine metabolism                 | ko00730 | K01662 | evm.TU.Chr11.272(TKT2)                   | dxs; 1-deoxy-D-xylulose-5-phosphate synthase [EC:2.2.1.7]                                        |
|  |   |                                    |         | K01662 | evm.TU.Chr6.165(TKT2)                    | dxs; 1-deoxy-D-xylulose-5-phosphate synthase [EC:2.2.1.7]                                        |
|  |   |                                    |         | K03147 | evm.TU.Chr11.287(THIC)                   | thiC; phosphomethylpyrimidine synthase [EC:4.1.99.17]                                            |
|  |   |                                    |         | K03147 | evm.TU.Chr6.177(THIC)                    | thiC; phosphomethylpyrimidine synthase [EC:4.1.99.17]                                            |
|  |   |                                    |         | K20896 | evm.TU.Chr6.73(TENA_E)                   | TENA_E; formylaminopyrimidine deformylase / aminopyrimidine aminohydrolase [EC:3.5.1.- 3.5.99.-] |
|  |   |                                    |         | K22911 | evm.TU.Chr20.970(TH2)                    | TH2; thiamine phosphate phosphatase / amino-HMP aminohydrolase [EC:3.1.3.100 3.5.99.-]           |
|  | 3 | Isoquinoline alkaloid biosynthesis | ko00950 | K00276 | evm.TU.Chr18.995(maoI)                   | AOC3, AOC2, tynA; primary-amine oxidase [EC:1.4.3.21]                                            |
|  |   |                                    |         | K00422 | evm.TU.Chr4.217(co-2)                    | E1.10.3.1; polyphenol oxidase [EC:1.10.3.1]                                                      |
|  |   |                                    |         | K00422 | evm.TU.Chr4.219(co-2)                    | E1.10.3.1; polyphenol oxidase [EC:1.10.3.1]                                                      |
|  |   |                                    |         | K00422 | evm.TU.Chr4.221(co-2)                    | E1.10.3.1; polyphenol oxidase [EC:1.10.3.1]                                                      |
|  |   |                                    |         | K00422 | evm.TU.Chr4.222(co-2)                    | E1.10.3.1; polyphenol oxidase [EC:1.10.3.1]                                                      |
|  |   |                                    |         | K00422 | evm.TU.Chr4.223(co-2))                   | E1.10.3.1; polyphenol oxidase [EC:1.10.3.1]                                                      |
